# Supplementary material for: Unravelling the structures of sodiated β-cyclodextrin and its fragments
Source: Phys Chem Chem Phys. 2021 Jun 7;23(24):13714–23. doi: 10.1039/d1cp01058a (PMC8220536; doi:10.1039/d1cp01058a)
Supplement: CP-023-D1CP01058A-s001 [file CP-023-D1CP01058A-s001.pdf]

## SUPPORTING INFORMATION

### Unravelling the structures of sodiated $\beta$ -cyclodextrin and its fragments

Jordan M. Rabus,<sup>b†</sup> Robert P. Pellegrinelli,<sup>a†</sup> Ali Hassan Abi Khodr,<sup>a</sup> Benjamin J. Bythell,<sup>b</sup>  
Thomas R. Rizzo<sup>a</sup> and Eduardo Carrascosa,<sup>\*a†</sup>

<sup>a</sup>Laboratoire de Chimie Physique Moléculaire, École Polytechnique Fédérale de Lausanne, EPFL SB  
ISIC LCPM, Station 6, CH-1015 Lausanne, Switzerland

<sup>b</sup>Department of Chemistry and Biochemistry, Ohio University, 391 Clippinger Laboratories, Athens,  
Ohio 45701, United States

### Table of Contents

|                                                                                                                                               |       |
|-----------------------------------------------------------------------------------------------------------------------------------------------|-------|
| Cover page .....                                                                                                                              | S1    |
| MS and MS <sup>2</sup> spectra of sodiated $\beta$ -CD in a commercial QToF spectrometer and resulting relative<br>fragment intensities ..... | S2    |
| Schematic representation of the IMS instrument and comparison of IR spectra .....                                                             | S3    |
| Comparison between Experiment and Theory based on lowest energy structures.....                                                               | S4-S6 |
| Proposed fragmentation mechanisms for CID products .....                                                                                      | S7    |
| Relative energies of candidate fragments calculated at different density functionals .....                                                    | S8    |

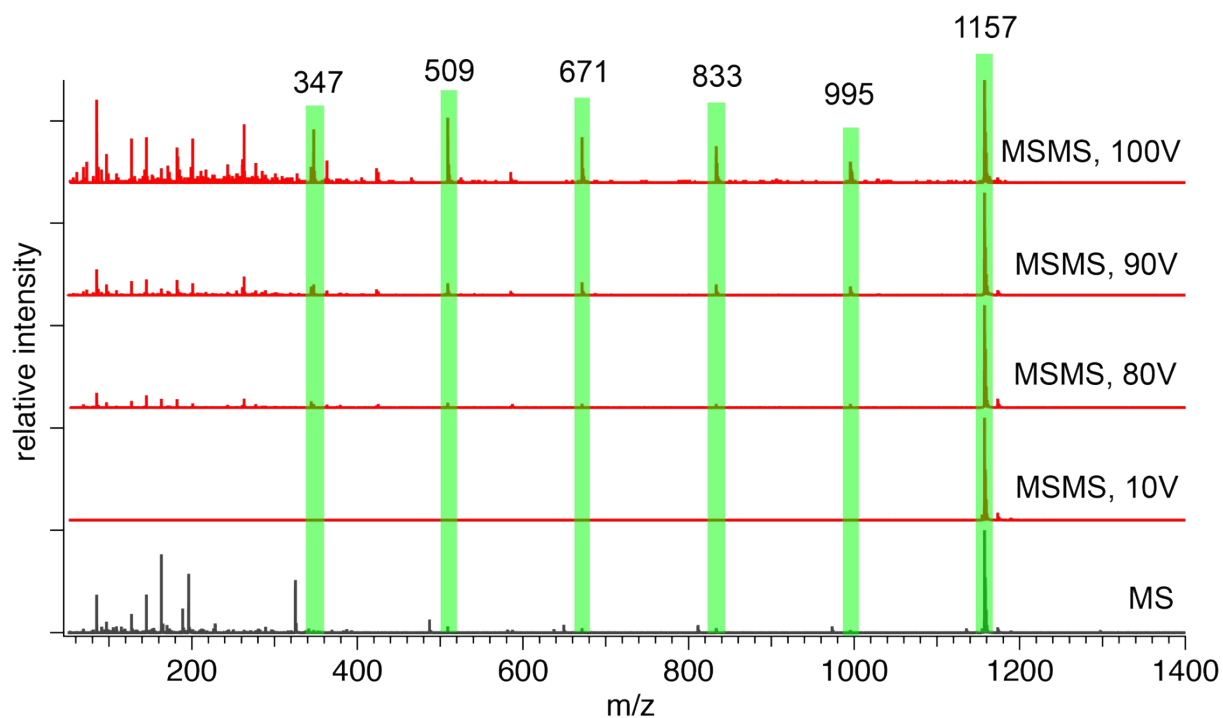

Figure S1: MS and MS<sup>2</sup> spectra of sodiated  $\beta$ -CD at different fragmentation energies in the collision cell of a commercial QToF spectrometer (Waters Permier). The MS spectrum shows the presence of protonated fragments either already present in solution or produced *in-source*. Formation of the main sodiated fragments starts at voltage difference of around 80V between the quadrupole bias and the collision cell bias. The main fragment masses are marked by green shaded areas.

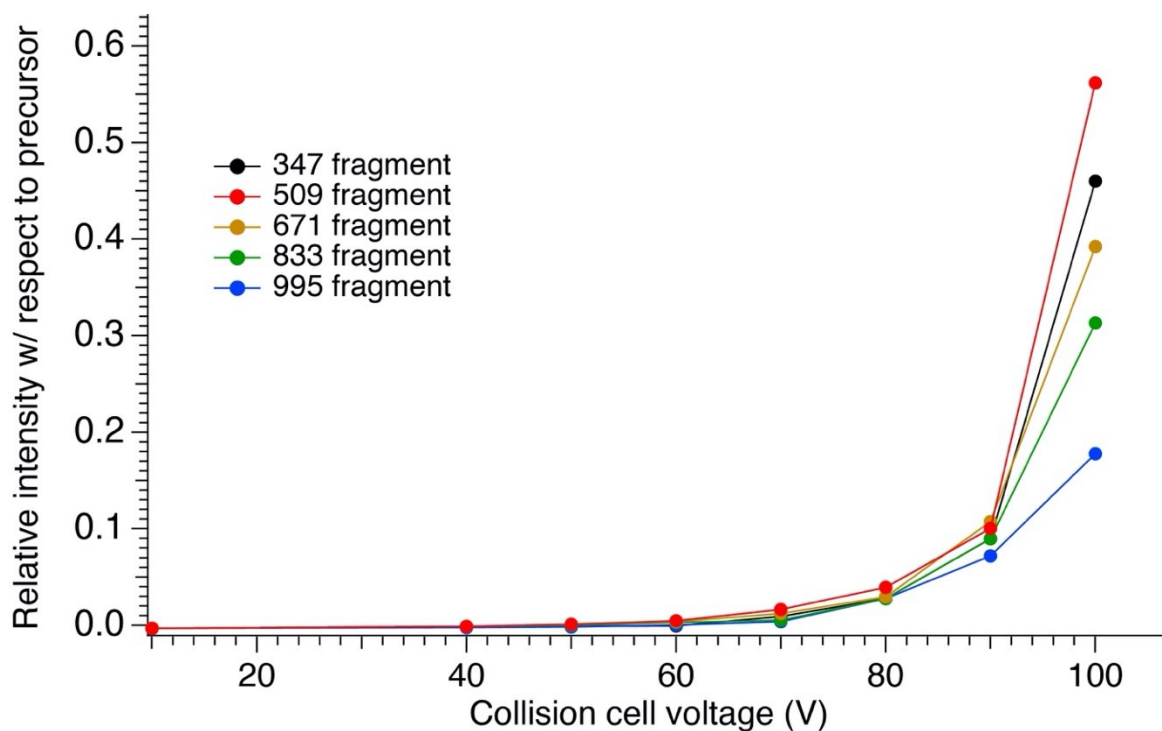

Figure S2: Relative intensity of CID fragments of sodiated  $\beta$ -CD normalized to the precursor intensity as a function of collision cell energies on a commercial QToF spectrometer (Waters Permier).

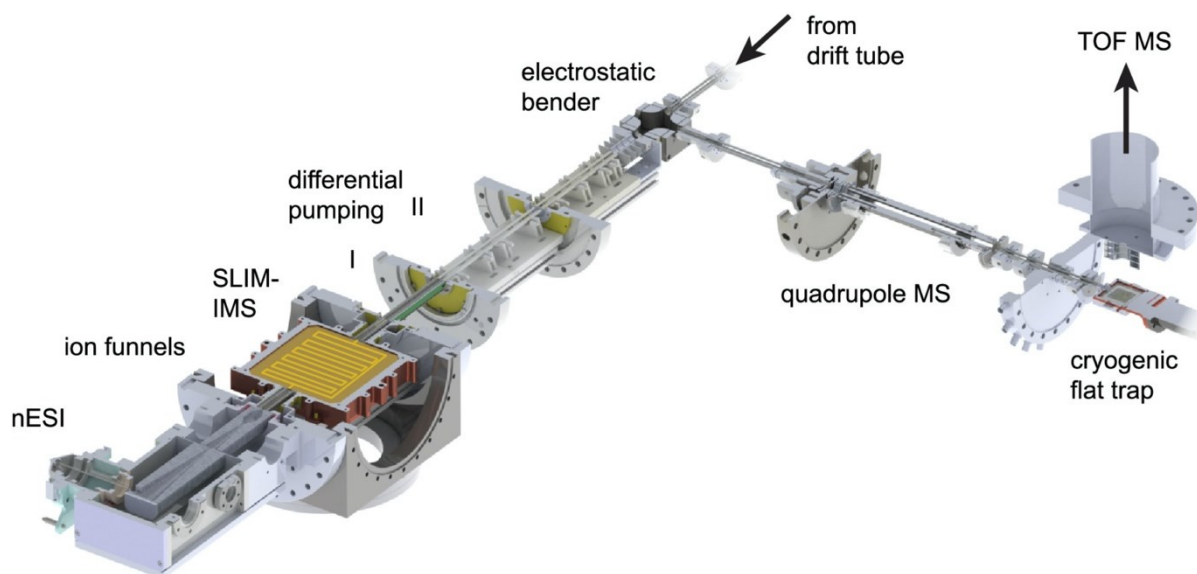

Figure S3: Schematic representation of the homebuilt ion mobility mass spectrometer used to obtain the ATDs and cryogenic spectra shown in Figure 4 of the manuscript, adapted with permission from reference 38. The apparatus consists of the same electrospray source, an ion funnel trap, a homebuilt SLIM type ion mobility spectrometer, a quadrupole mass filter and a cryogenically cooled ion trap coupled to an orthogonal time-of-flight spectrometer.

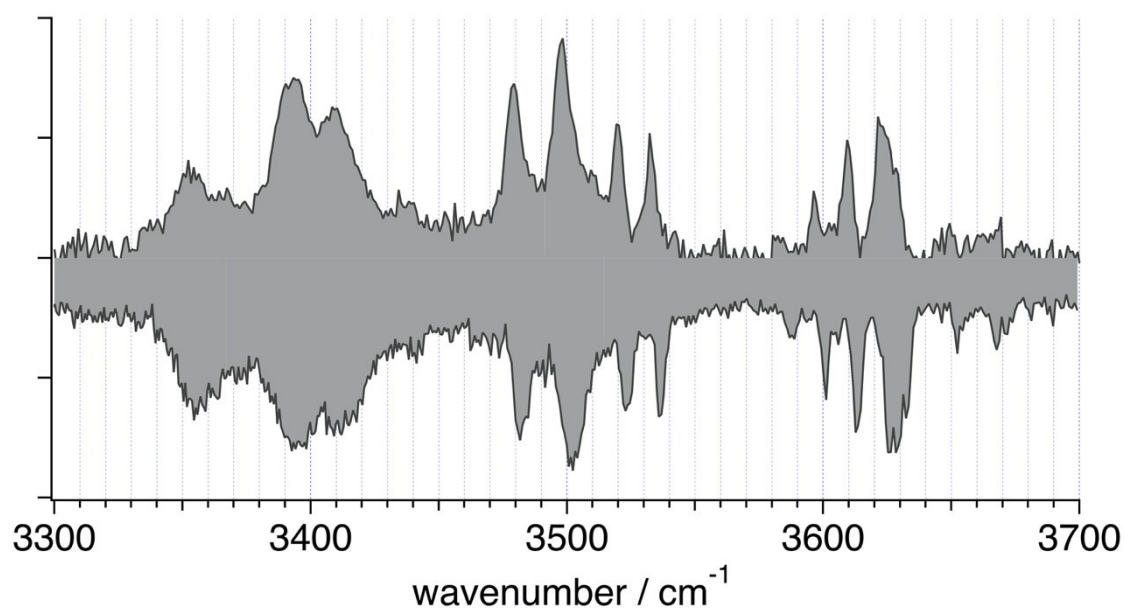

Figure S4: Cryogenic IR spectra of sodiated  $\beta$ -CD measured on the tandem mass spectrometer shown in Figure 2 of the manuscript (upper spectrum) and on the IMS-MS instrument shown in Figure S3 (lower spectrum). Both spectra were taken at the same temperature conditions and using  $N_2$  as tagging molecules. The small shift observed in the bands come from a slightly different laser calibration.

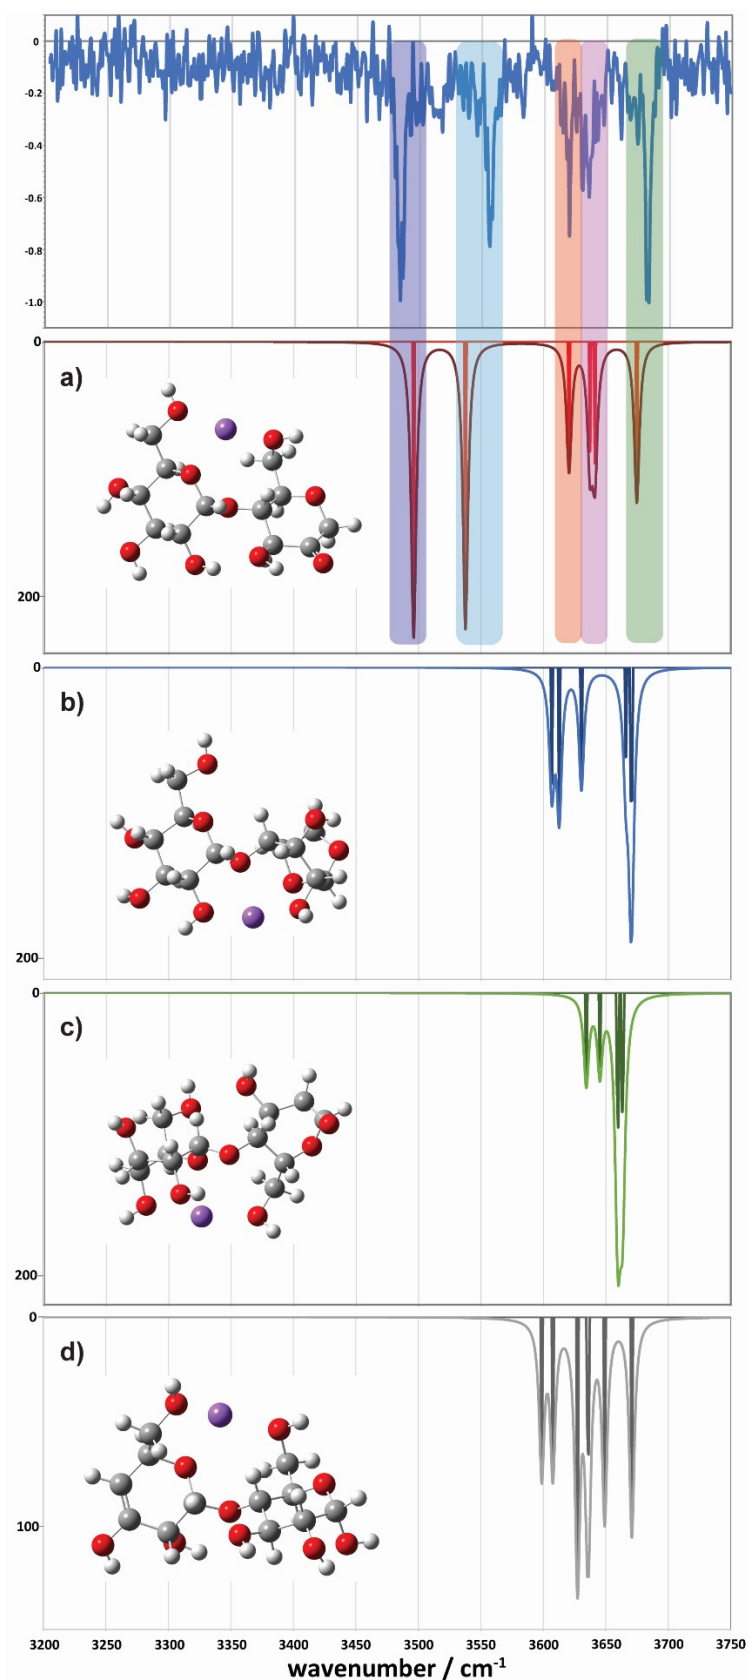

Figure S5: Comparison of  $m/z$  347 lowest energy theoretical spectra with the experimental IR spectrum: lowest energy (a) 2-ketone  $B_2$  ion structure; (b) 1,6-anhydro  $B_2$  ion structure; (c) 1,2-anhydro  $B_2$  ion structure; (d)  $Z_2$  ion structure calculated at the B3LYP/6-31+G(d,p) level of theory. This Figure is reproduced from Figure 7 of the manuscript as single-column, full size figure for better visibility of the results.

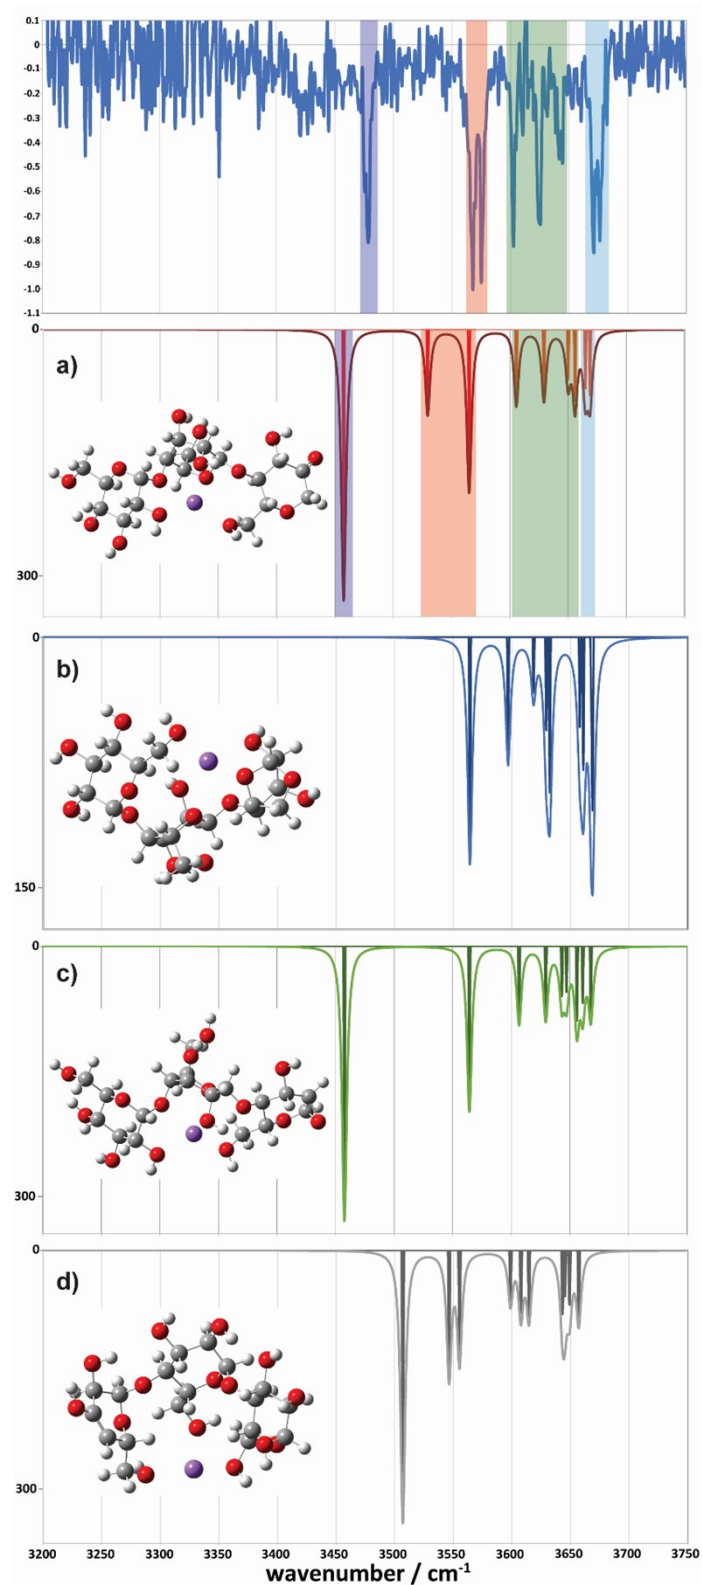

Figure S6: Comparison of  $m/z$  509 lowest energy theoretical spectra with the experimental IR spectrum: lowest energy (a) 2-ketone  $B_3$  ion structure; (b) 1,6-anhydro  $B_3$  ion structure; (c) 1,2-anhydro  $B_3$  ion structure; (d)  $Z_3$  ion structure calculated at the B3LYP/6-31+G(d,p) level of theory. This Figure is reproduced from Figure 8 of the manuscript as single-column, full size figure for better visibility of the results.

Expt:

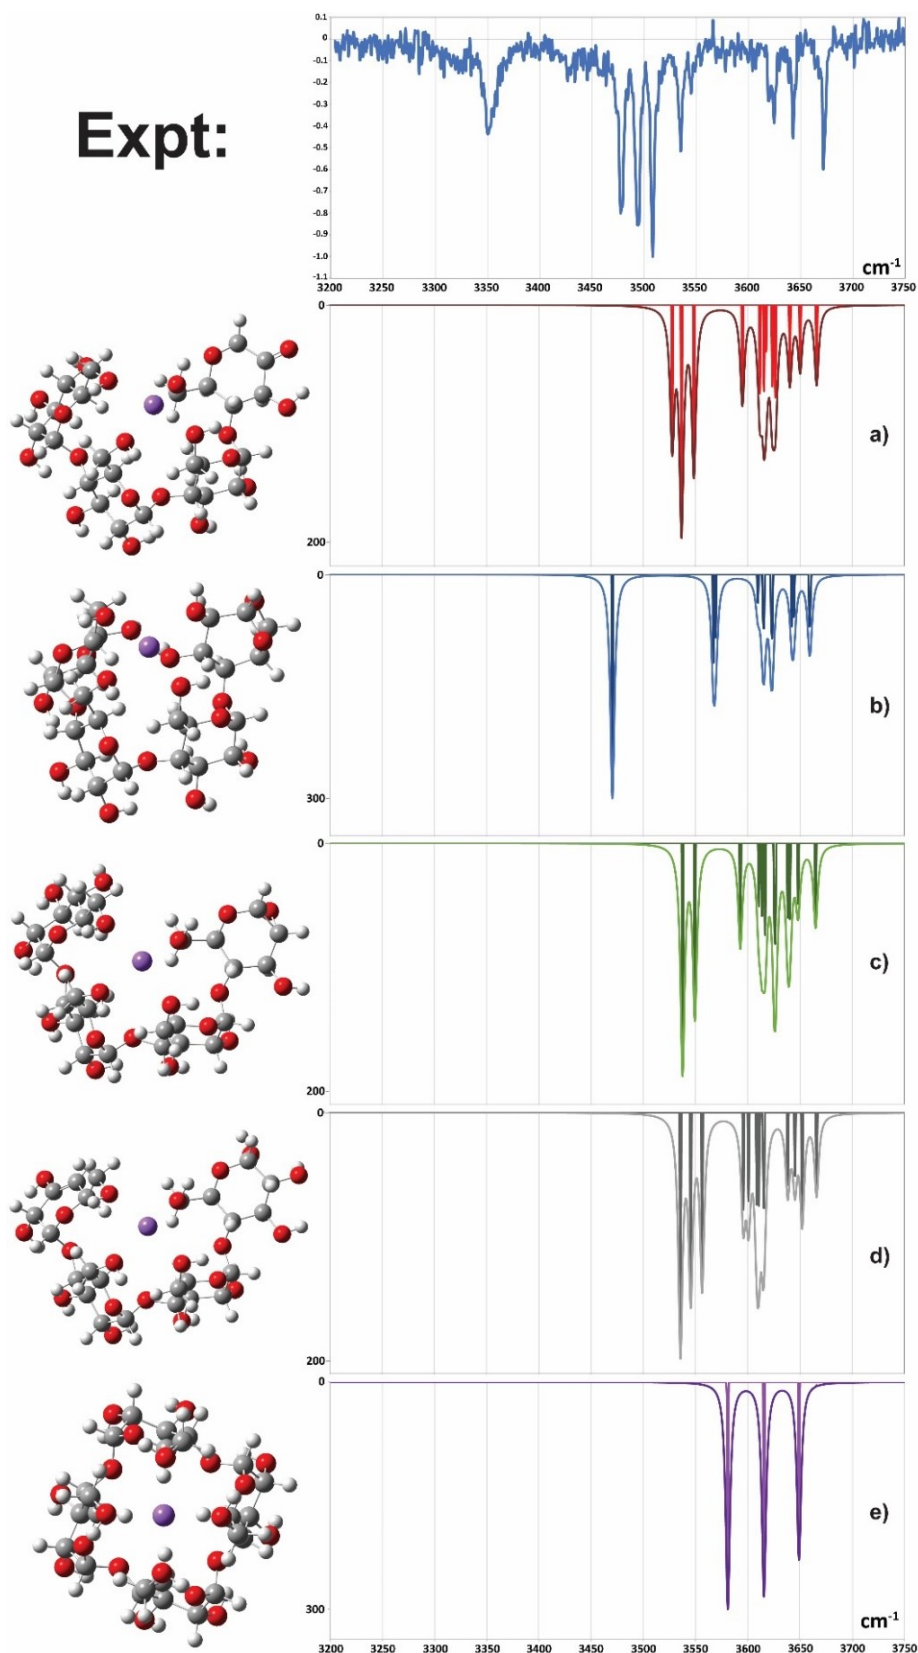

Figure S7: Comparison of  $m/z$  671 lowest energy theoretical spectra with the experimental IR spectrum: lowest energy (a) 2-ketone  $B_4$  ion structure; (b) 1,6-anhydro  $B_4$  ion structure; (c) 1,2-anhydro  $B_4$  ion structure; (d)  $Z_4$  ion structure; (e) Cyclic ion (symmetrical) calculated at the B3LYP/6-31+G(d,p) level of theory.

## Putative fragmentation mechanisms for CID products

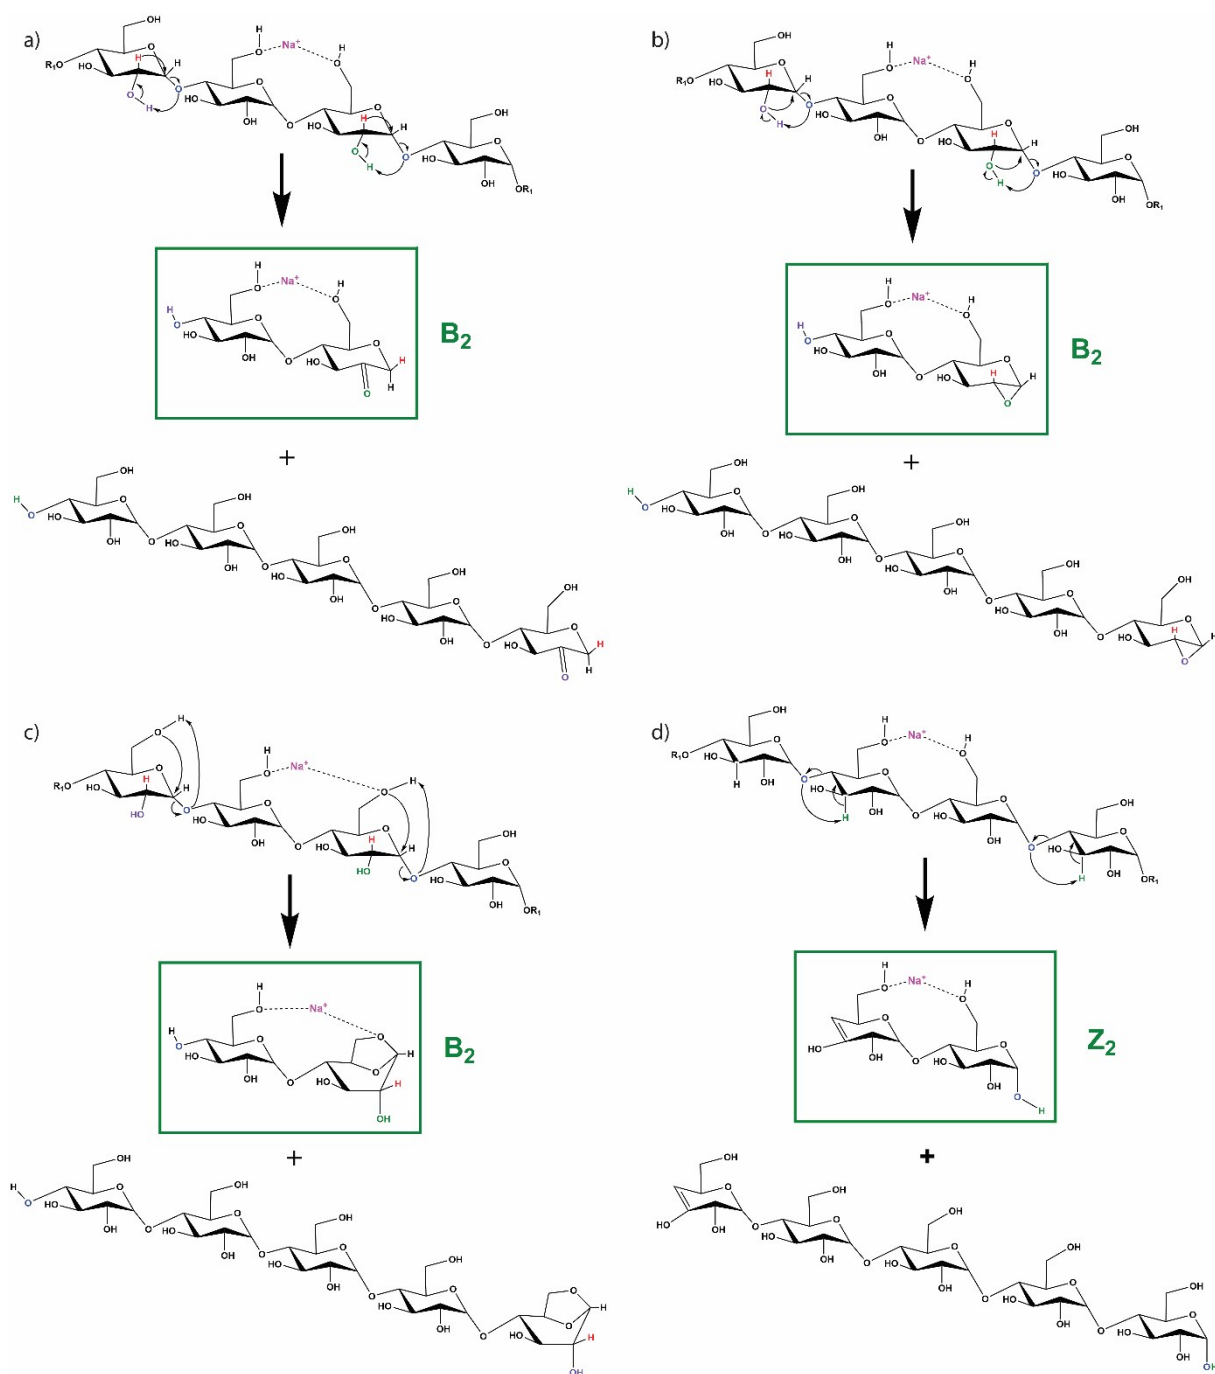

Figure S8: Simplified mechanisms for glycosidic bond dissociation in [β-CD+Na]<sup>+</sup> leading to the (a) 2-ketone B<sub>2</sub> ion, (b) the 1,2-anhydro B<sub>2</sub> ion, (c) the 1,6-anhydro B<sub>2</sub> ion products and the (d) Z<sub>2</sub> ion product. The latter involves formation of an alkene bond between C3 and C4 of the non-reducing end of the product ion.

**Relative energies of the candidate ion structures calculated at different levels of theory**

| m/z 347 Structures         | $\Delta E_{\text{el,0K}} + \text{ZPE}$ ( $\Delta G_{298\text{K}}$ )<br>B3LYP/6-31+G(d,p) | $\Delta E_{\text{el,0K}}$<br>M06-2X/6-311+G(2d,p) <sup>a</sup> | $\Delta E_{\text{el,0K}}$<br>wB97XD/6-311+G(2d,p) <sup>a</sup> |
|----------------------------|------------------------------------------------------------------------------------------|----------------------------------------------------------------|----------------------------------------------------------------|
| Ketone B <sub>2</sub>      | 0 (0)                                                                                    | 7.0                                                            | 0                                                              |
| Z <sub>2</sub>             | 14.9 (12.8)                                                                              | 14.4                                                           | 15.8                                                           |
| 1,6-andydro B <sub>2</sub> | 22.2 (24.2)                                                                              | 0                                                              | 3.4                                                            |
| 1,2-andydro B <sub>2</sub> | 106.4 (106.2)                                                                            | 84.8                                                           | 90.0                                                           |

**Table S1.** Relative energies of *m/z* 347 minima. Superscript “a” indicates single point calculations performed using the structure of each type calculated at the B3LYP/6-31+G(d,p) level of theory. Energies are given in kJ mol<sup>-1</sup>.

| m/z 509 Structures         | $\Delta E_{\text{el,0K}} + \text{ZPE}$ ( $\Delta G_{298\text{K}}$ )<br>B3LYP/6-31+G(d,p) | $\Delta E_{\text{el,0K}}$<br>M06-2X/6-311+G(2d,p) <sup>a</sup> | $\Delta E_{\text{el,0K}}$<br>wB97XD/6-311+G(2d,p) <sup>a</sup> |
|----------------------------|------------------------------------------------------------------------------------------|----------------------------------------------------------------|----------------------------------------------------------------|
| Ketone B <sub>3</sub>      | 0 (0)                                                                                    | 9.9                                                            | 0                                                              |
| Z <sub>3</sub>             | 21.8 (32.0)                                                                              | 21.3                                                           | 19.5                                                           |
| 1,6-andydro B <sub>3</sub> | 29.2 (44.8)                                                                              | 0                                                              | 0.3                                                            |
| 1,2-andydro B <sub>3</sub> | 86.5 (92.0)                                                                              | 83.7                                                           | 85.5                                                           |

**Table S2.** Relative energies of *m/z* 509 minima. Superscript “a” indicates single point calculations performed using the structure calculated at the B3LYP/6-31+G(d,p) level of theory. Energies are given in kJ mol<sup>-1</sup>.

| m/z 671 Structures         | $\Delta E_{\text{el,0K}} + \text{ZPE}$ ( $\Delta G_{298\text{K}}$ )<br>B3LYP/6-31+G(d,p) | $\Delta E_{\text{el,0K}}$<br>M06-2X/6-311+G(2d,p) <sup>a</sup> | $\Delta E_{\text{el,0K}}$<br>wB97XD/6-311+G(2d,p) <sup>a</sup> |
|----------------------------|------------------------------------------------------------------------------------------|----------------------------------------------------------------|----------------------------------------------------------------|
| Ketone B <sub>4</sub>      | 0 (0)                                                                                    | 0                                                              | 0                                                              |
| Z <sub>4</sub>             | 11.5 (14.9)                                                                              | 2.0                                                            | 11.0                                                           |
| 1,6-andydro B <sub>4</sub> | 41.6 (37.5)                                                                              | 1.4                                                            | 4.2                                                            |
| Cyclic                     | 56.3 (73.4)                                                                              | 58.6                                                           | 10.2                                                           |
| 1,2-andydro B <sub>4</sub> | 89.0 (90.2)                                                                              | 74.4                                                           | 83.4                                                           |

**Table S3.** Relative energies of *m/z* 671 minima. Superscript “a” indicates single point calculations performed using the structure calculated at the B3LYP/6-31+G(d,p) level of theory. Energies are given in kJ mol<sup>-1</sup>.
